# Supplementary material for: Trimorphism of a model carcinogen 4-nitroquinoline-N-oxide
Source: Royal Society of Chemistry journal article supplement (doi:10.1039/b905845a), 2009-01-01
Supplement: b905845a.pdf [file b905845a.pdf]

Supplementary information for *CrystEngComm* Paper

## Trimorphism of Model Carcinogen 4-Nitroquinoline-N-oxide<sup>†</sup>

Yakov P. Nizhnik, Jian Jiang Lu, Sergiy V. Rosokha and Jay K. Kochi,  
Department of Chemistry, University of Houston,  
Houston TX 77204 USA  
Fax: 713-743-2709; Tel: 713-743-3293;  
E-mail: srosokha@uh.edu

### Synthesis of 4-nitroquinoline N-oxide<sup>1,2</sup>

74 ml of 30 % hydrogen peroxide was added to a solution of 97 ml (106,1 g; 0.822 mol) of freshly distilled (*in vacuo*) quinoline in 245 ml of 99.7% acetic acid, and the mixture was heated and stirred at 65-70°C for 3 hours. Then, 66 ml of hydrogen peroxide was added, and the mixture was stirred at 65-70°C for 6 hours. The reaction mixture was concentrated in vacuum, and the residue was basified by the cautious addition of saturated solution of Na<sub>2</sub>CO<sub>3</sub> with stirring. The reddish-brown solution was extracted with chloroform (4×200 ml). The extract was dried over MgSO<sub>4</sub> overnight, filtered and brown oil containing quinoline N-oxide was obtained after chloroform evaporation under reduced pressure. 205 ml of 95-98 % sulfuric acid was cautiously added to this oil. 52 ml of 68-70% nitric acid was added portionwise over a period of 40 min with frequent stirring at 65-70°C, and the mixture was heated during 3 hours at 70°C. Then the mixture was cooled, put on ice and addition of 3 l of water resulted in precipitation of 4-nitro-quinoline-N-oxide as the yellow sediment. It was filtered on Buchner funnel, washed with water, 5% solution of Na<sub>2</sub>CO<sub>3</sub> to neutral reaction, water and small amount of ethanol. Residue was dried on air (137 g) and recrystallised from acetone as yellow needle crystals. Yield 103 g (66 % based on quinoline). M.p. 154°C (lit. data 153-154°C).

**Note:** **NQO** should be handled with care. Proper ventilation, protective gloves and safety glasses should be used. Nitrogroup can be easily replaced on chlorine in mixture of concentrated hydrochloric acid acetonitrile (1:10) at room temperature during the 1-2 days, yielding 4-chloroquinoline N-oxide,<sup>3,4</sup> so this system may be successfully used to utilize the residue of **NQO**.

1. E. Ochiai, *Aromatic Amine Oxides*; Elsevier: Amsterdam, London, New York. 1967.
2. E. Ochiai, *J. Org. Chem.*, 1953, **18**, 534.
3. V. P. Andreev, E. G. Kalistratova and A. V. Ryzhakov, *Chem. Heterocycl. Comp. (Latvia)*, 1996, **32**, 449.
4. V. P. Andreev and Y. P. Nizhnik, *Russ. J. Org. Chem.* 2001, **37**, 143.

Table S1. IR-spectral characteristics of polymorphs of **NQO** (in  $\text{cm}^{-1}$ ).<sup>a</sup>

| Form I             | Form II          | Form III       | Assignment                         | Calculated frequencies <sup>b</sup>                    |
|--------------------|------------------|----------------|------------------------------------|--------------------------------------------------------|
| <i>3126 w</i>      | <i>3131 w</i>    | <i>3117 w</i>  | v(C-H)                             | 3196(17)                                               |
| <i>3099 w</i>      | <i>3112 w</i>    | <i>3097 w</i>  |                                    | 3180(8)                                                |
| 1588 w             | 1590 w           | 1590 w         |                                    | 1633(75) NO <sub>2</sub> (asymm) stretch + C-H bending |
| 1565 m             | 1566 m           | 1565 m         |                                    | 1614(113) NO <sub>2</sub> (asymm) + ring stretch       |
| <i>1518 s</i>      | <i>1514 s</i>    | <i>1514 s</i>  | v <sub>as</sub> (NO <sub>2</sub> ) | 1575(103) NO <sub>2</sub> (asymm) stretch+ C-H bending |
| <i>1507.5 m</i>    | <i>1507 w</i>    | <i>1506 sh</i> |                                    | 1560(49)                                               |
| <i>1498 w</i>      | <i>1496 w</i>    |                |                                    | 1482(30)                                               |
| 1445 w             | 1444 w           | 1446 w         |                                    | 1471(14)                                               |
| 1427 m-w           | 1425 w           | 1427 w         |                                    | 1429(91)                                               |
| 1388 m             | 1387 m           | 1387.5 m       |                                    | 1381(14)                                               |
| <i>1356 w</i>      | <i>1356 w</i>    | <i>1355 w</i>  | v <sub>s</sub> (NO <sub>2</sub> )  |                                                        |
| <i>1342 m</i>      | <i>1344 m</i>    | <i>1339 m</i>  |                                    |                                                        |
| <i>1333 m</i>      | <i>1333 m</i>    | <i>1330 m</i>  |                                    | 1374 (59) NO <sub>2</sub> (symm) + ring stretching     |
| <i>1297 sh. vs</i> | <i>1299 vs</i>   | <i>1299 vs</i> | v(N-O)                             | 1339(609) NO <sub>2</sub> (symm) + NO stretching       |
| <i>1293 vs</i>     | <i>1289.5 vs</i> | <i>1289 sh</i> |                                    | 1288(10)                                               |
| 1258 w             | 1257 w           | 1260 w         |                                    | 1283(2)                                                |
| 1237 m             | 1242 m           | 1242 w         |                                    | 1219(36)                                               |
| 1200 w             | 1199 w           | 1198 m         |                                    | 1196(5)                                                |
| <i>1163 w</i>      | <i>1166 m</i>    | <i>1165 w</i>  |                                    | 1182(70)                                               |
| <i>1156 m</i>      | <i>1151 s</i>    | <i>1155 s</i>  |                                    | 1156(16)                                               |
| <i>1129 w</i>      | <i>1130 m</i>    | <i>1132 m</i>  |                                    | 1094(3)                                                |
| 1068 w             | 1066 w           | 1069 w         |                                    | 1057(20)                                               |
| 1030 w             | 1028 w           | 1030 w         |                                    | 1010(56)                                               |
| 1000 w             | 1001 w           | 998 sh         |                                    | 1008(4)                                                |
| 988 w              | 991              | 987 m          |                                    | 984(1)                                                 |
| 967 w              | 964 w            |                |                                    | 965(4)                                                 |
| 938 w              | 941 w            | 945 w          |                                    |                                                        |
| 926 w              |                  |                |                                    |                                                        |
| 876 w              | 873 w            | 873 w          |                                    | 887(0.3)                                               |
| <i>836 w</i>       | <i>843 m</i>     | <i>845 m</i>   | δ(NO <sub>2</sub> )                | 854 (16) (NO <sub>2</sub> scissoring)                  |
| <i>829 s</i>       | <i>835 w</i>     | <i>834 m</i>   | γ(CH)                              | 841(31) (C-H wagging)                                  |
| 793 w              | 790 w            | 788 w-m        |                                    | 803(10)                                                |
| 769 w              | 773 m            |                |                                    |                                                        |
| 764 vs             | 767 s            | 766 vs         |                                    | 783(74) (C-H wagging)                                  |
| 736 s              | 739 s            | 739 s          |                                    | 756(12)                                                |
| 722 w              | 725 w            | 727 w          |                                    | 732 (5.5)                                              |

i) Bands in IR-spectra which were used for the identification of polymorphs of **NQO** are shown in italics. Note, that bands assignment was done based on the Gaussian 98 (B3LYP/6-311G\* Freq) calculations<sup>c</sup> together with the analysis of the related data in the next references: A. R. Katritzky and J. N. Gardner, *J. Chem. Soc.*, 1958, 2192. A. R. Katritzky and A. R. Hands, *J. Chem. Soc.*, 1958, 2195. H. Shindo, *Chem Pharm Bull.*, 1956, **6**, 117; P. Plaza, F. Le Guiner, M. Joyeux, N.Q. Dao, J. Zyss and R. Hierle, *J. Mol. Struct.*, 1991, **247**, 363; M. Joyeux, M. T. C. Martins Costa, D. Rinaldi and N. Q. Dao, *Spectrochimica Acta*, 1989, **45A**, 967; M. Joyeux and N. Q. Dao, *Spectrochimica Acta*, 1988, **44A**, 1447; E. Lorenz, M. Maczka, K. Hermanowicz, A. Waskowska, A. Puszko and J. Hanuza, *Vibrational Spectroscopy*, 2005, **37**, 195; J. Hanuza, J. Michalski, M. Maczka, Z. Talik and J. H. van der Maas, *Vibrational Spectroscopy*, 2002, **33**, 229. b) In parenthesis – calculated intensities, in KM/mole. c) Extensive hydrogen bonding in NQO crystals is apparently major reason of deviations between band positions measured for different polymorphs, as well as between experimental and calculated values.

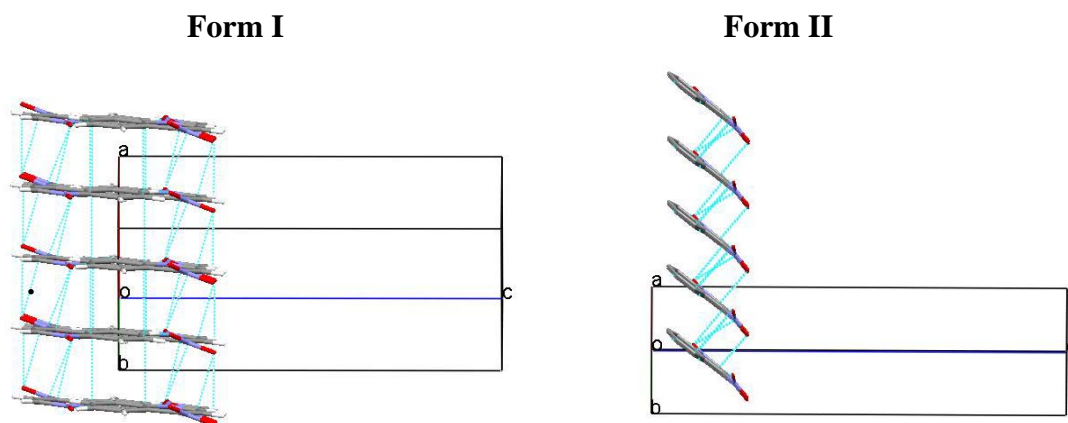

**Fig.S1.** Layers of parallel NQO molecules in crystal lattices of forms I and II.

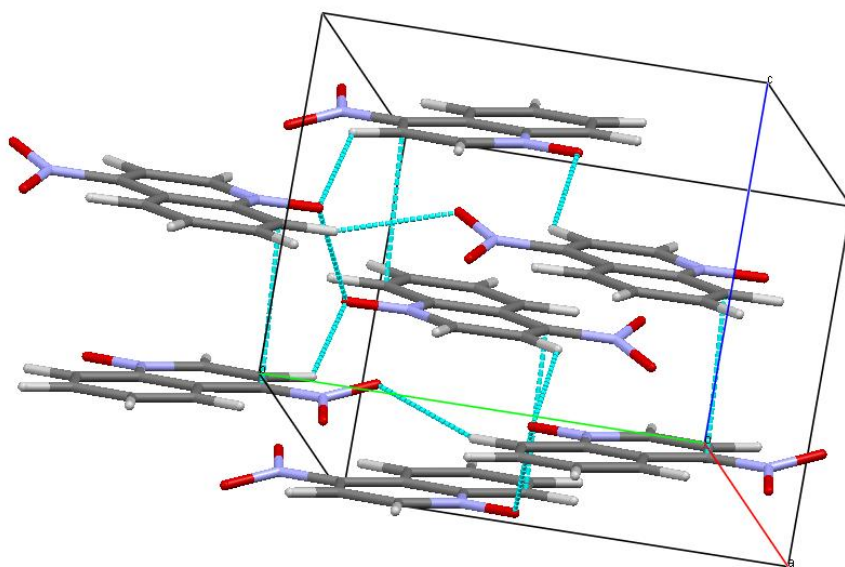

**Fig.S2.** Crystal lattice of form III of NQO ((R. S. Basalaev, T. A. Semenova and L. A. Aleshina, private communication) .
